# Supplementary material for: Amino acid-appended pyromellitic diimide liquid materials, their photoluminescence, and the thermal response that turns the photoluminescence off
Source: Royal Society of Chemistry journal article supplement (doi:10.1039/d4cc02229g), 2024-01-01
Supplement: d4cc02229g1.pdf [file d4cc02229g1.pdf]

## Amino acid-appended pyromellitic diimide liquid materials, their photoluminescence, and thermal response turning photoluminescence off

Takumi Omura,<sup>[a][b]</sup> Shogo Morisako,<sup>[a]</sup> Kyosuke Isoda\*<sup>[a]</sup>

[a] Organic Materials Chemistry Group, Sagami Chemical Research Institute, 2743-1 Hayakawa, Ayase, Kanagawa 252-1193, Japan

E-mail: k-isoda@sagami.or.jp

[b] Division of Molecular Sciences, Graduate School of Science, Kitasato University, 1-15-1 Kitasato Minami-ku, Sagami-hara, Kanagawa, 252-0373, Japan

### S0. Author Contributions

**Takumi Omura:** Experiments. **Shogo Morisako:** Single crystal X-ray Analysis and DFT calculations. **Kyosuke Isoda:** Writing - original draft, Supervision, Project administration, Funding acquisition.

### S1. Experimental Procedures

#### General remarks

The <sup>1</sup>H and <sup>13</sup>C NMR spectra were recorded on a Bruker Ascend™ Avance III HD 400MHz or UltraShield Plus 400 MHz NMR spectrometers (<sup>1</sup>H: 400 MHz, <sup>13</sup>C: 101 MHz). All the spectroscopic measurements were carried out at room temperature. The chemical shifts of the <sup>1</sup>H and <sup>13</sup>C NMR signals are quoted relative to tetramethylsilane ( $\delta = 0.00$ ) as internal standards. High-resolution atmospheric pressure chemical ionization time-of-flight (APCI-TOF) mass spectra were collected on a Bruker compact QTOF. UV-vis absorption spectra were recorded on a JASCO V-770 UV-vis spectrometer, whereas the fluorescence spectra and the photoluminescent quantum yield (PLQY) were recorded on a JASCO FP-8500 luminescence spectrophotometer. UV-vis and PL spectra were measured in thin films coated onto glass substrates. DSC and TG-DTA measurements were performed on a Hitachi High-Tech EXSTAR6000 DSA6220 and Hitachi High-Tech EXSTAR6000 TG/DTA6200 at a scan rate of 10 °C min<sup>-1</sup>. X-ray diffraction measurements were performed on a Rigaku SmartLab. A OLYMPUS BX53M optical and polarizing optical microscope equipped with a Mettler FP90/82HT hot stage was used for visual observations of the optical textures. All reagents, all naphthalene derivatives, and solvents were purchased from FUJIFILM Wako Pure Chemical Co., Tokyo Chemical Industry Co., Ltd., Kanto Chemical Co., Inc., or Sigma Aldrich, and were used as received. **L-Val-PMDI** was prepared according to previous reports.<sup>1</sup>

## Synthesis of BR-L-Val-PMDI (1)

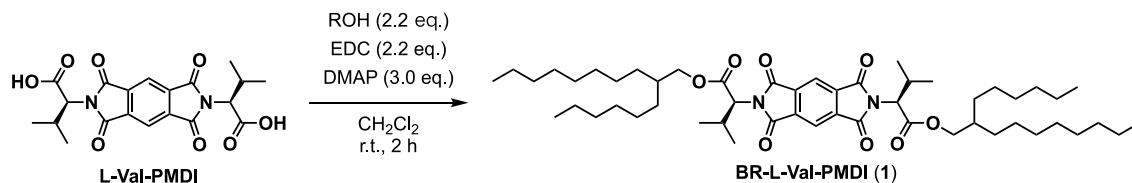

To a flask charged with **L-Val-PMDI** (1.04 g, 2.50 mmol) in  $\text{CH}_2\text{Cl}_2$  (50 mL), 2-hexyl-1-decanol (1.33 g, 5.49 mmol), 1-ethyl-3-(3-dimethylaminopropyl)carbodiimide hydrochloride (EDC, 1.05 g, 5.48 mmol), and 4-dimethylaminopyridine (DMAP, 0.916 g, 7.50 mmol) were added at room temperature. The resulting mixture was stirred at room temperature for 2 h. After the addition of deionized water, the resulting mixture was extracted with  $\text{CHCl}_3$  (3 times) and the combined organic layer was dried over  $\text{Na}_2\text{SO}_4$ , filtered, and evaporated. The residual oil was purified by column chromatography (silica gel) with  $\text{CHCl}_3$ /hexane (10:1) as the eluent to give **BR-L-Val-PMDI (1)** (1.12 g, 1.29 mmol, 52%) as a colorless oil ( $R_f$  = 0.80).

**1**:  $^1\text{H}$  NMR (400 MHz,  $\text{CDCl}_3$ )  $\delta$  8.32 (s, 2H, Ha), 4.63 (d,  $J$  = 8 Hz, 2H, Hb), 4.05 (d,  $J$  = 6 Hz, 4H, Hc), 2.80 (dh,  $J$  = 14, 7 Hz, 2H, Hd), 1.61–1.52 (m, 2H, He), 1.32–1.14 (m, 54H, Hf and Hg or Hi), 0.92 (d,  $J$  = 7 Hz, 6H, Hg or Hi), 0.88 (t,  $J$  = 7 Hz, 6H, Hj or Hk), 0.86 (t,  $J$  = 7 Hz, 6H, Hj or Hk);  $^{13}\text{C}$   $\{^1\text{H}\}$  NMR (101 MHz,  $\text{CDCl}_3$ )  $\delta$  168.3 (C), 165.6 (C), 137.0 (C), 118.8 (CH), 68.5 (O– $\text{CH}_2$ ), 58.6 (N–CH), 37.2 (O( $\text{CH}_2$ )CH), 31.9 ( $\text{CH}_2$ ), 31.7 ( $\text{CH}_2$ ), 31.2 ( $\text{CH}_2$ ), 29.9 ( $\text{CH}_2$ ), 29.6 ( $\text{CH}_2$ ), 29.5 ( $\text{CH}_2$ ), 29.3 ( $\text{CH}_2$ ), 28.5 ( $\text{CH}(\text{CH}_3)_2$ ), 26.6 ( $\text{CH}_2$ ), 26.6 ( $\text{CH}_2$ ), 26.5 ( $\text{CH}_2$ ), 22.7 ( $\text{CH}_2$ ), 22.6 ( $\text{CH}_2$ ), 21.0 ( $\text{CH}_3$ ), 19.6 ( $\text{CH}_3$ ), 14.1 ( $\text{CH}_3$ ), 14.1 ( $\text{CH}_3$ ). HRMS (ESI),  $m/z$ : Found: 865.6284 ( $[\text{M}+\text{H}]^+$ ), Calcd. for  $\text{C}_{52}\text{H}_{85}\text{N}_2\text{O}_8$  ( $[\text{M}+\text{H}]^+$ ): 865.6300.

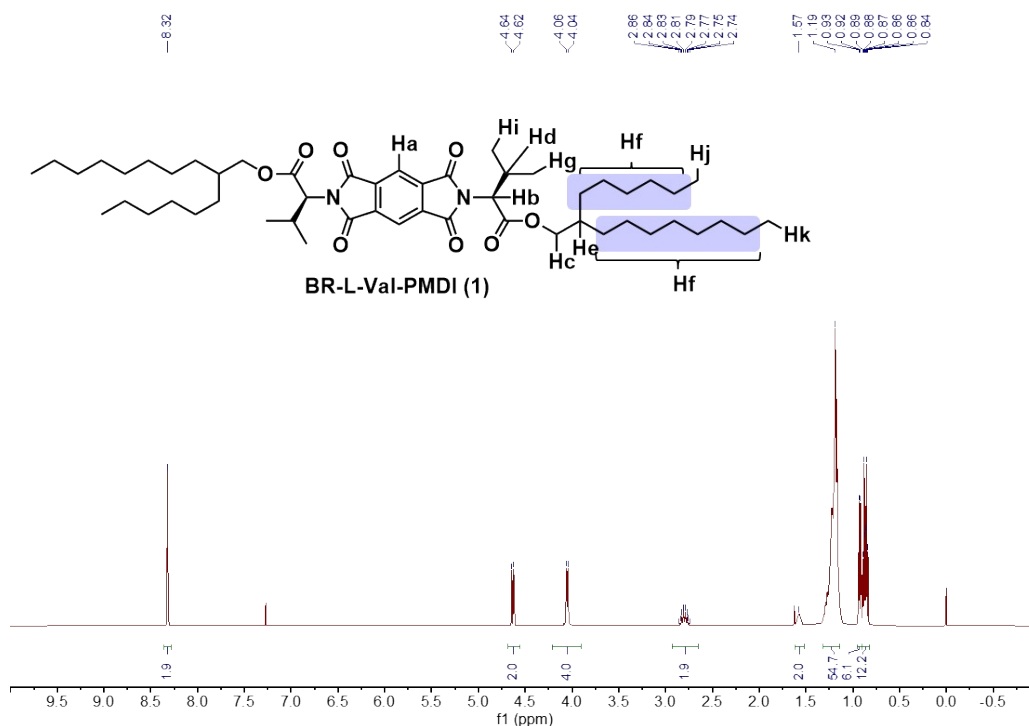

**Figure S1-1.**  $^1\text{H}$  NMR spectrum of **BR-L-Val-PMDI (1)** in  $\text{CDCl}_3$ .

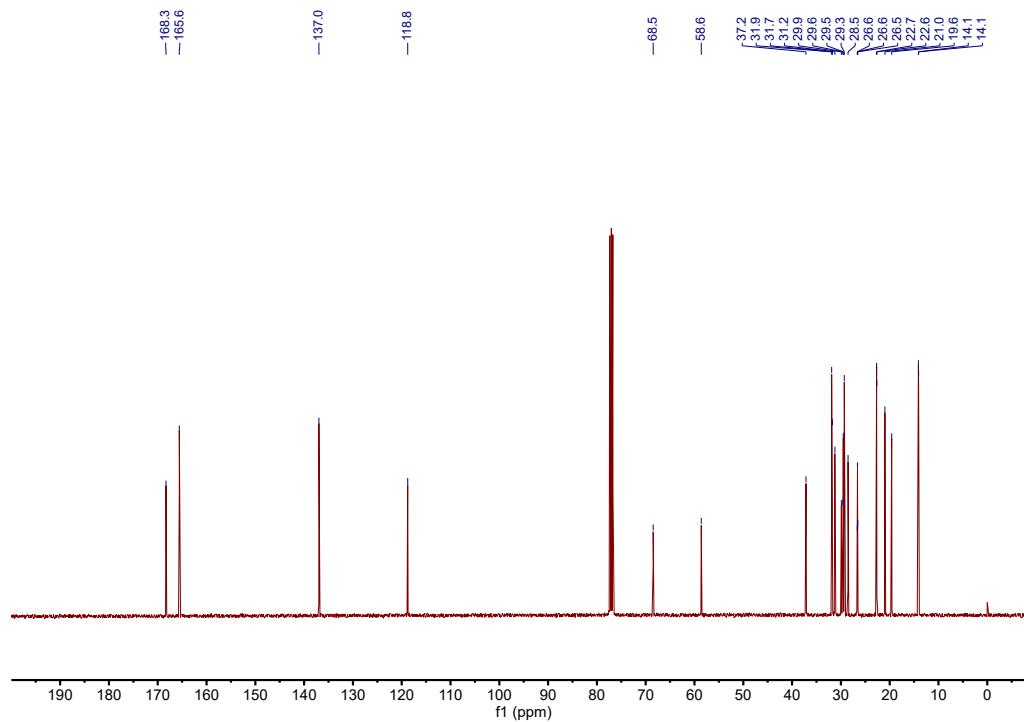

**Figure S1-2.**  $^{13}\text{C}\{^1\text{H}\}$  NMR spectrum of **BR-L-Val-PMDI (1)** in  $\text{CDCl}_3$ .

## S2. Crystal Structure Determination

Co-crystal was obtained by recrystallization of **L-Val-PMDI** and naphthalene (**NA-H**) from AcOEt. Crystallographic data for are summarized in Tables S1. Intensity data were collected on a Rigaku XtaLAB Synergy system using Cu- $K\alpha$  radiation ( $\lambda = 1.54184 \text{ \AA}$ ). The structures were solved using the *SHELXT* program (ver. 2018/2)<sup>2</sup> and refined by a full-matrix least-squares method on  $F^2$  for all reflections using the *SHELXL* program (ver. 2018/3 or 2019/3).<sup>3</sup> All non-hydrogen atoms were refined anisotropically, and the positions of all hydrogen atoms were calculated geometrically and refined as riding models. Supplementary crystallographic data were deposited at the Cambridge Crystallographic Data Centre (CCDC) under deposition numbers CCDC-2373409 (**L-Val-PMDI**) and CCDC-2353953 (**L-Val-PMDI-NA-H**) can be obtained free of charge via [www.ccdc.cam.ac.uk/data\\_request.cif](http://www.ccdc.cam.ac.uk/data_request.cif).

**Table S2-1.** Crystallographic data of **L-Val-PMDI** and its **NA-H** complex.

| Compound                                        | <b>L-Val-PMDI</b>                                | <b>L-Val-PMDI-NA-H</b>                                                    |
|-------------------------------------------------|--------------------------------------------------|---------------------------------------------------------------------------|
| Formula                                         | $\text{C}_{20}\text{H}_{20}\text{N}_2\text{O}_8$ | $\text{C}_{20}\text{H}_{20}\text{N}_2\text{O}_8(\text{C}_{10}\text{H}_8)$ |
| Molecular Weight                                | 416.38                                           | 544.54                                                                    |
| Temperature / °C                                | −173                                             | −173                                                                      |
| $\lambda$ / Å                                   | 1.54184                                          | 1.54184                                                                   |
| Crystal size / mm                               | $0.3 \times 0.2 \times 0.05$                     | $0.2 \times 0.15 \times 0.02$                                             |
| Crystal system                                  | Monoclinic                                       | Monoclinic                                                                |
| Space group                                     | $C2_1$ (#5)                                      | $P2_1$ (#4)                                                               |
| $a$ / Å                                         | 28.6709(4)                                       | 7.55420(10)                                                               |
| $b$ / Å                                         | 5.29200(10)                                      | 7.02420(10)                                                               |
| $c$ / Å                                         | 13.0480(2)                                       | 24.7028(3)                                                                |
| $\alpha$ / °                                    | 90                                               | 90                                                                        |
| $\beta$ / °                                     | 100.4960(10)                                     | 96.9480(10)                                                               |
| $\gamma$ / °                                    | 90                                               | 90                                                                        |
| $V$ / Å <sup>3</sup>                            | 1946.60(5)                                       | 1301.16(3)                                                                |
| $Z$                                             | 4                                                | 2                                                                         |
| $\mu$ / mm <sup>−1</sup>                        | 0.943                                            | 0.844                                                                     |
| $D_{\text{calcd.}}$ / g·cm <sup>−3</sup>        | 1.421                                            | 1.390                                                                     |
| $\theta_{\text{max}}$ / °                       | 72.620                                           | 72.906                                                                    |
| Data/restr./param.                              | 3749/1/277                                       | 5020/1/367                                                                |
| Completeness / %                                | 100.0                                            | 100.0                                                                     |
| GOF                                             | 1.058                                            | 1.033                                                                     |
| $R_1$ ( $I > 2\sigma(I)$ )                      | 0.0264                                           | 0.0257                                                                    |
| $wR_2$ ( $I > 2\sigma(I)$ )                     | 0.0705                                           | 0.0698                                                                    |
| $R_1$ (all data)                                | 0.0270                                           | 0.0259                                                                    |
| $wR_2$ (all data)                               | 0.0711                                           | 0.0701                                                                    |
| Largest diff. peak and hole / e·Å <sup>−3</sup> | 0.280, 0.163                                     | 0.179, −0.201                                                             |
| CCDC number                                     | 2373409                                          | 2353953                                                                   |
| Solv. for crystallization                       | Acetone, r.t.                                    | AcOEt, r.t.                                                               |

### S3. Experimental data

#### S3-1. NA-H

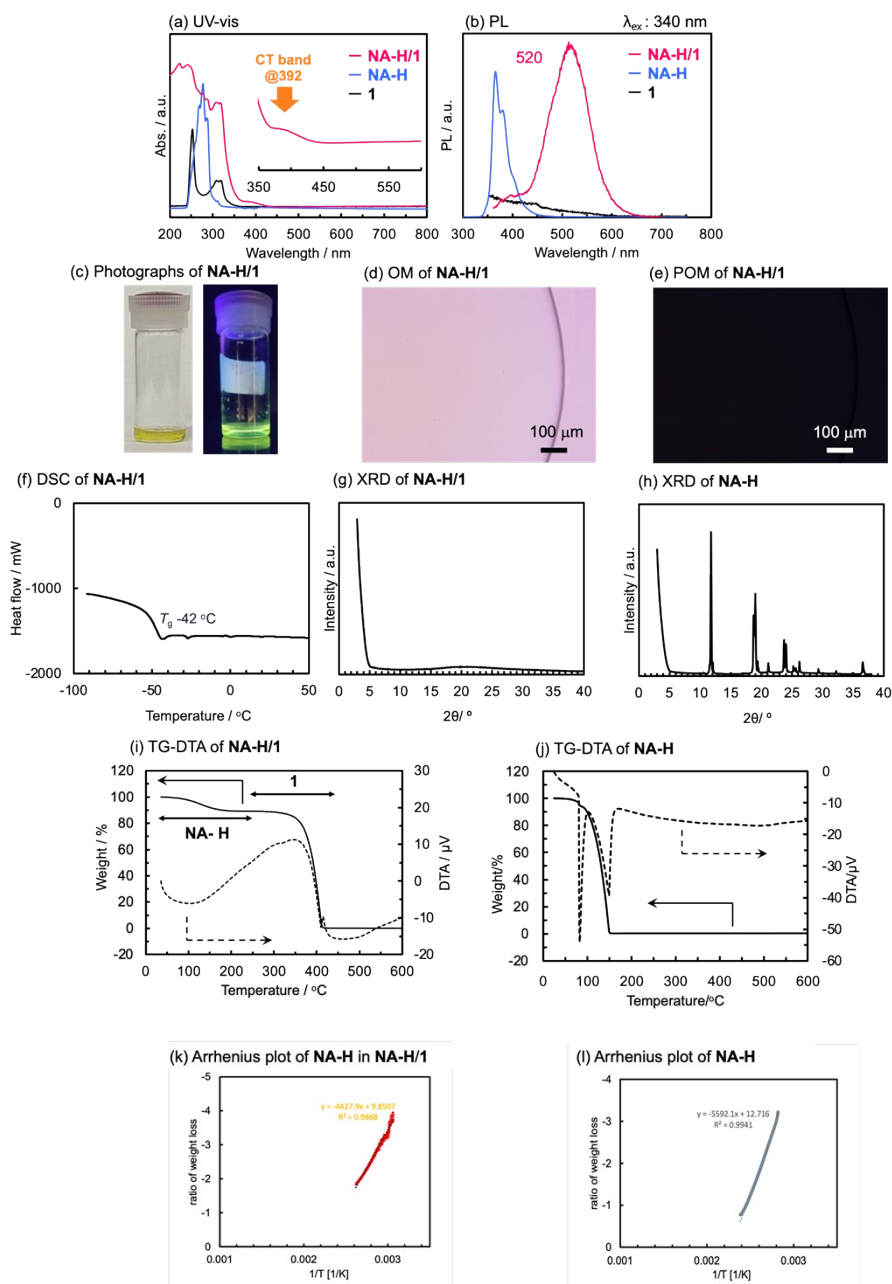

**Figure S3-1.** (a) UV-vis absorption and (b) PL spectra of **NA-H/1**, **NA-H**, and **1**. (c) Photographs of **NA-H/1** under room light (left) and black light (right) at r.t. (d and e) OM and POM observations of **NA-H/1** at r.t. (f) DSC traces of **NA-H/1** on 2nd heating at a scanning velocity of 10 °C/min. (g and h) XRD patterns of **NA-H/1** and **NA-H** at r.t. (i and j) TG-DTA traces of **NA-H** and **NA-H/1** under N<sub>2</sub> atmosphere. (k and l) Temperature dependences for weight loss due to vaporization process of **NA-H** (ln*W* vs *T*<sup>-1</sup>) at 10 K/min heating rate under N<sub>2</sub> atmosphere. These plots correspond to the range of weight loss of **NA-H**. The values shown in the figure indicate activation energies of each condition.

### S3-2. $\text{NA-N(CH}_3)_2$

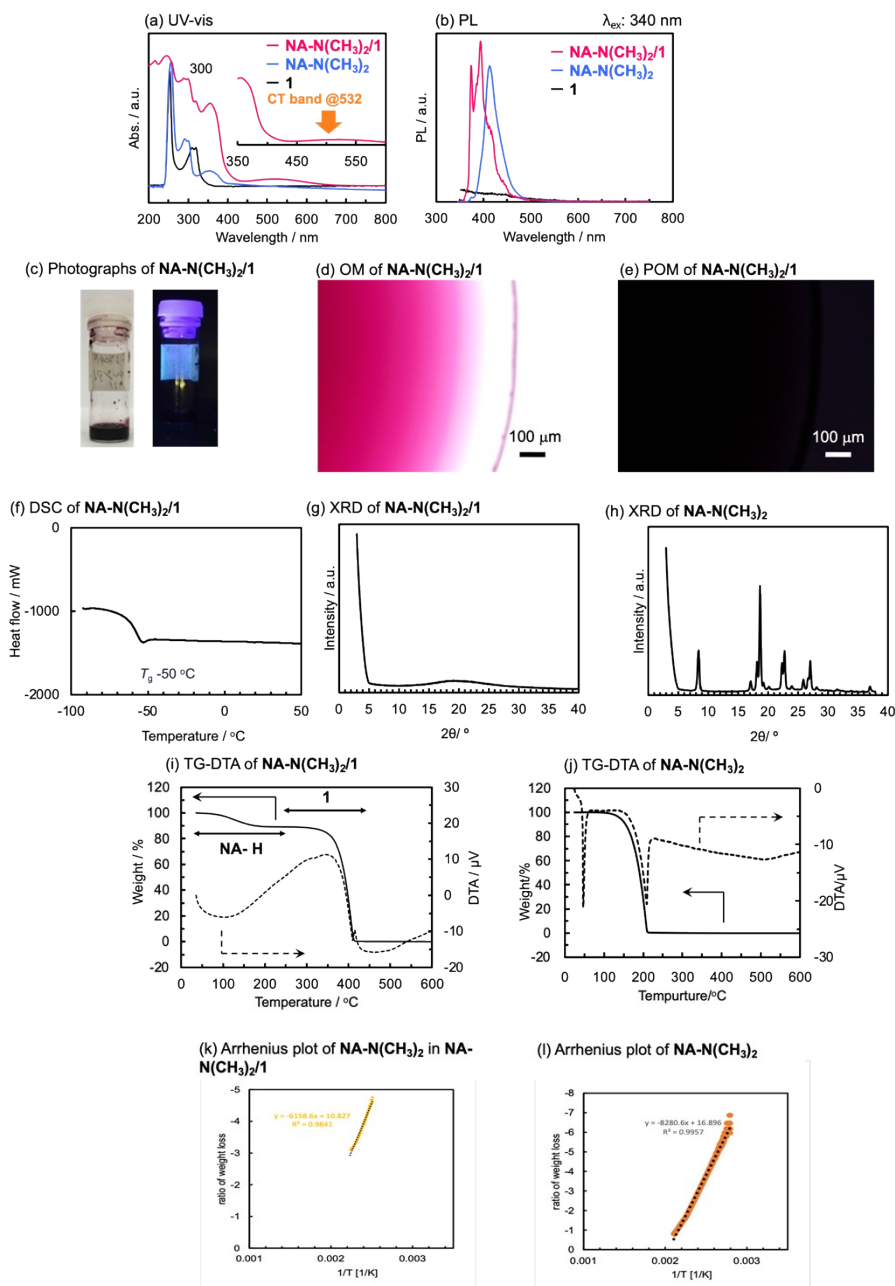

**Figure S3-2.** (a) UV-vis absorption and (b) PL spectra of  $\text{NA-N(CH}_3)_2/1$ ,  $\text{NA-N(CH}_3)_2$ , and **1**. (c) Photographs of  $\text{NA-N(CH}_3)_2/1$  under room light (left) and black light (right) at r.t. (d and e) OM and POM observations of  $\text{NA-N(CH}_3)_2$  at r.t. (f) DSC traces of  $\text{NA-N(CH}_3)_2/1$  on 2nd heating at a scanning velocity of 10 °C/min. (g and h) XRD patterns of  $\text{NA-N(CH}_3)_2/1$  and  $\text{NA-N(CH}_3)_2$  at r.t. (i and j) TG-DTA traces of  $\text{NA-N(CH}_3)_2$  and  $\text{NA-N(CH}_3)_2/1$  under  $\text{N}_2$  atmosphere. (k and l) Temperature dependences for weight loss due to vaporization process of  $\text{NA-N(CH}_3)_2$  ( $\ln W$  vs  $T^{-1}$ ) at 10 K/min heating rate under  $\text{N}_2$  atmosphere. These plots correspond to the range of weight loss of  $\text{NA-N(CH}_3)_2$ . The values shown in the figure indicate activation energies of each condition.

### S3-3. NA-OCH<sub>3</sub>

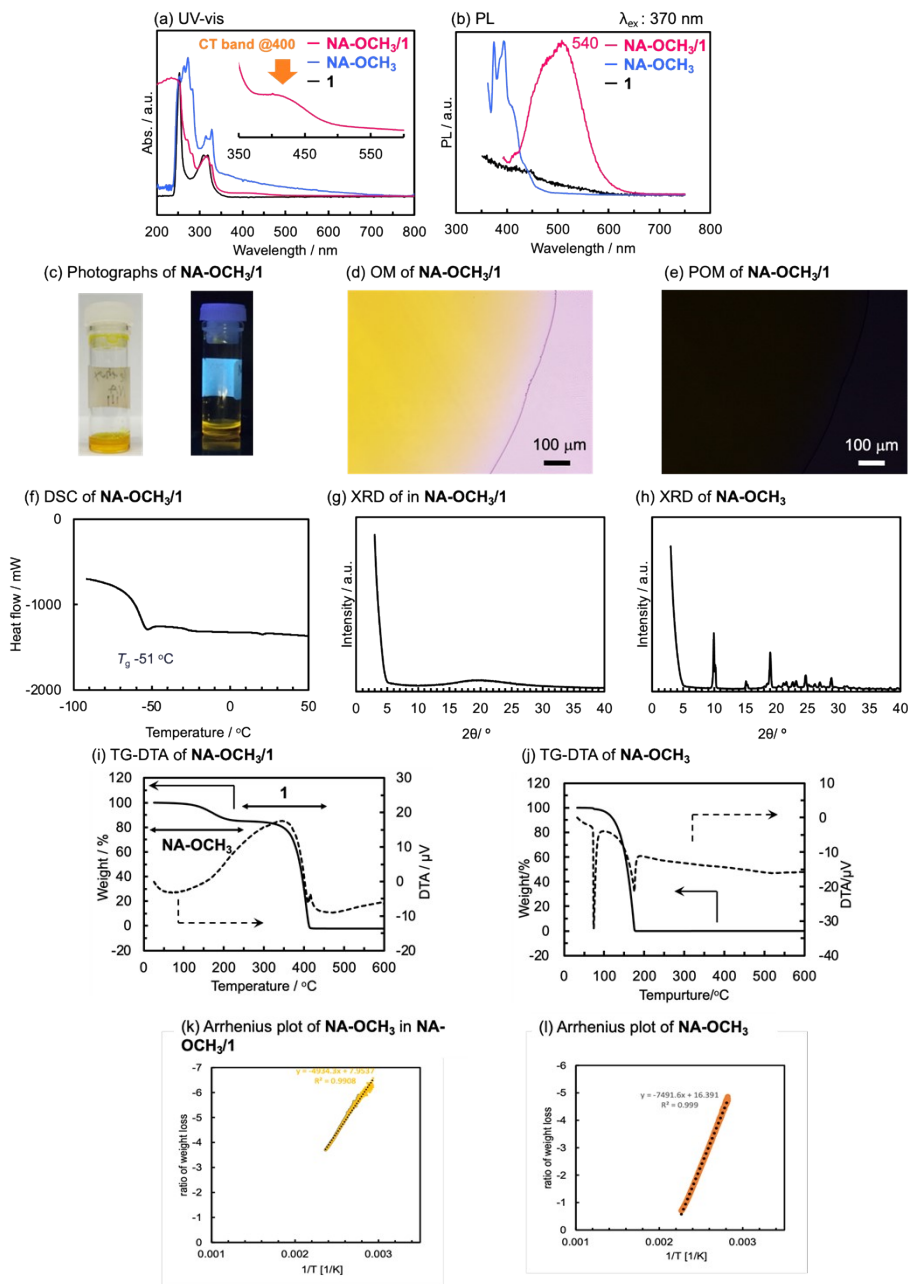

**Figure S3-3.** (a) UV-vis absorption and (b) PL spectra of NA-OCH<sub>3</sub>/1, NA-OCH<sub>3</sub>, and **1**. (c) Photographs of NA-OCH<sub>3</sub>/1 under room light (left) and black light (right) at r.t. (d and e) OM and POM observations of NA-OCH<sub>3</sub> at r.t. (f) DSC traces of NA-OCH<sub>3</sub>/1 on 2nd heating at a scanning velocity of 10 °C/min. (g and h) XRD patterns of NA-OCH<sub>3</sub>/1 and NA-OCH<sub>3</sub> at r.t. (i and j) TG-DTA traces of NA-OCH<sub>3</sub> and NA-OCH<sub>3</sub>/1 under N<sub>2</sub> atmosphere. (k and l) Temperature dependences for weight loss due to vaporization process of NA-OCH<sub>3</sub> (ln*W* vs *T*<sup>-1</sup>) at 10 K/min heating rate under N<sub>2</sub> atmosphere. These plots correspond to the range of weight loss of NA-OCH<sub>3</sub>. The values shown in the figure indicate activation energies of each condition.

### S3-4. NA-CH<sub>3</sub>

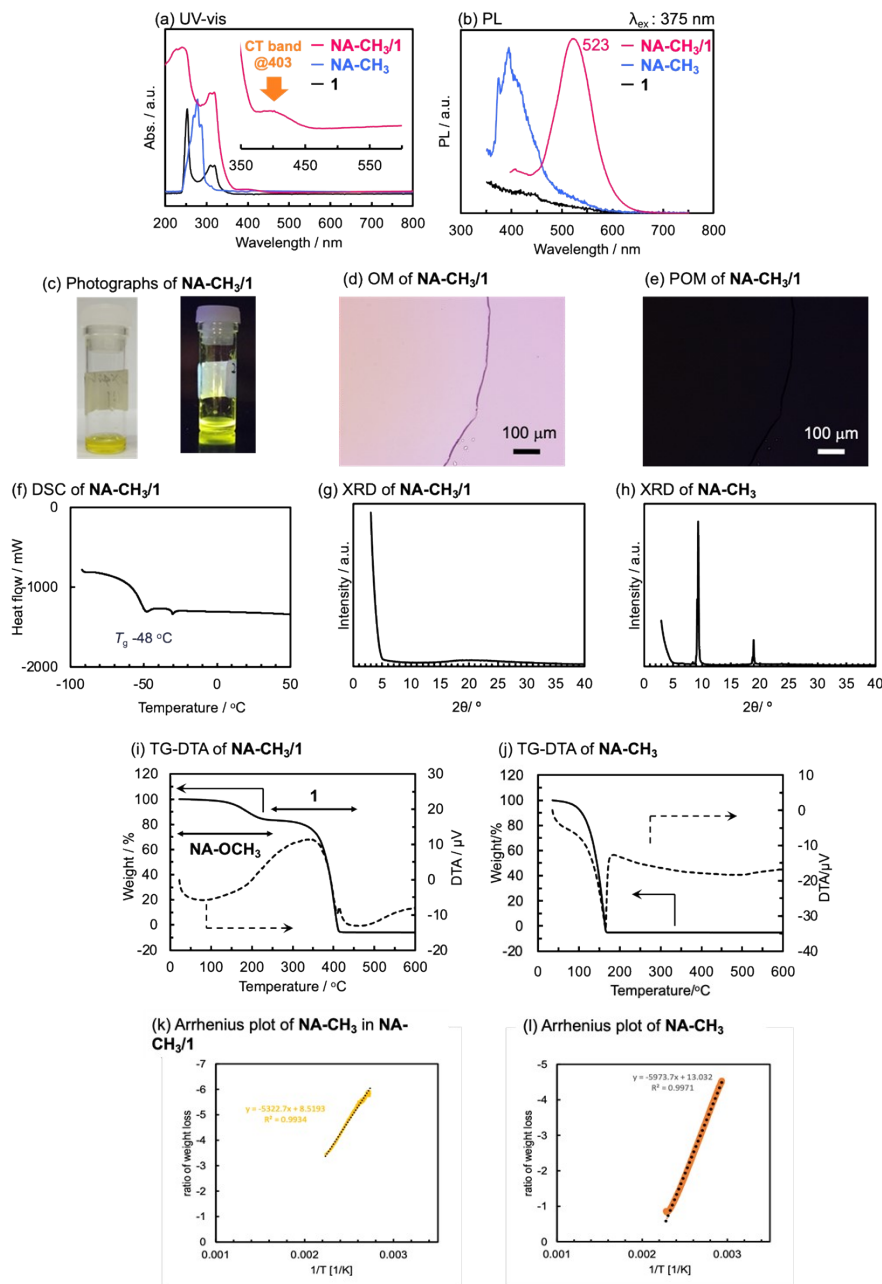

**Figure S3-4.** (a) UV-vis absorption and (b) PL spectra of **NA-CH<sub>3</sub>/1**, **NA-CH<sub>3</sub>**, and **1**. (c) Photographs of **NA-CH<sub>3</sub>/1** under room light (left) and black light (right) at r.t. (d and e) OM and POM observations of **NA-CH<sub>3</sub>** at r.t. (f) DSC traces of **NA-CH<sub>3</sub>/1** on 2nd heating at a scanning velocity of 10 °C/min. (g and h) XRD patterns of **NA-CH<sub>3</sub>/1** and **NA-CH<sub>3</sub>** at r.t. (i and j) TG-DTA traces of **NA-CH<sub>3</sub>** and **NA-CH<sub>3</sub>/1** under N<sub>2</sub> atmosphere. (k and l) Temperature dependences for weight loss due to vaporization process of **NA-CH<sub>3</sub>** ( $\ln W$  vs  $T^{-1}$ ) at 10 K/min heating rate under N<sub>2</sub> atmosphere. These plots correspond to the range of weight loss of **NA-CH<sub>3</sub>**. The values shown in the figure indicate activation energies of each condition.

### S3-5. NA-Cl

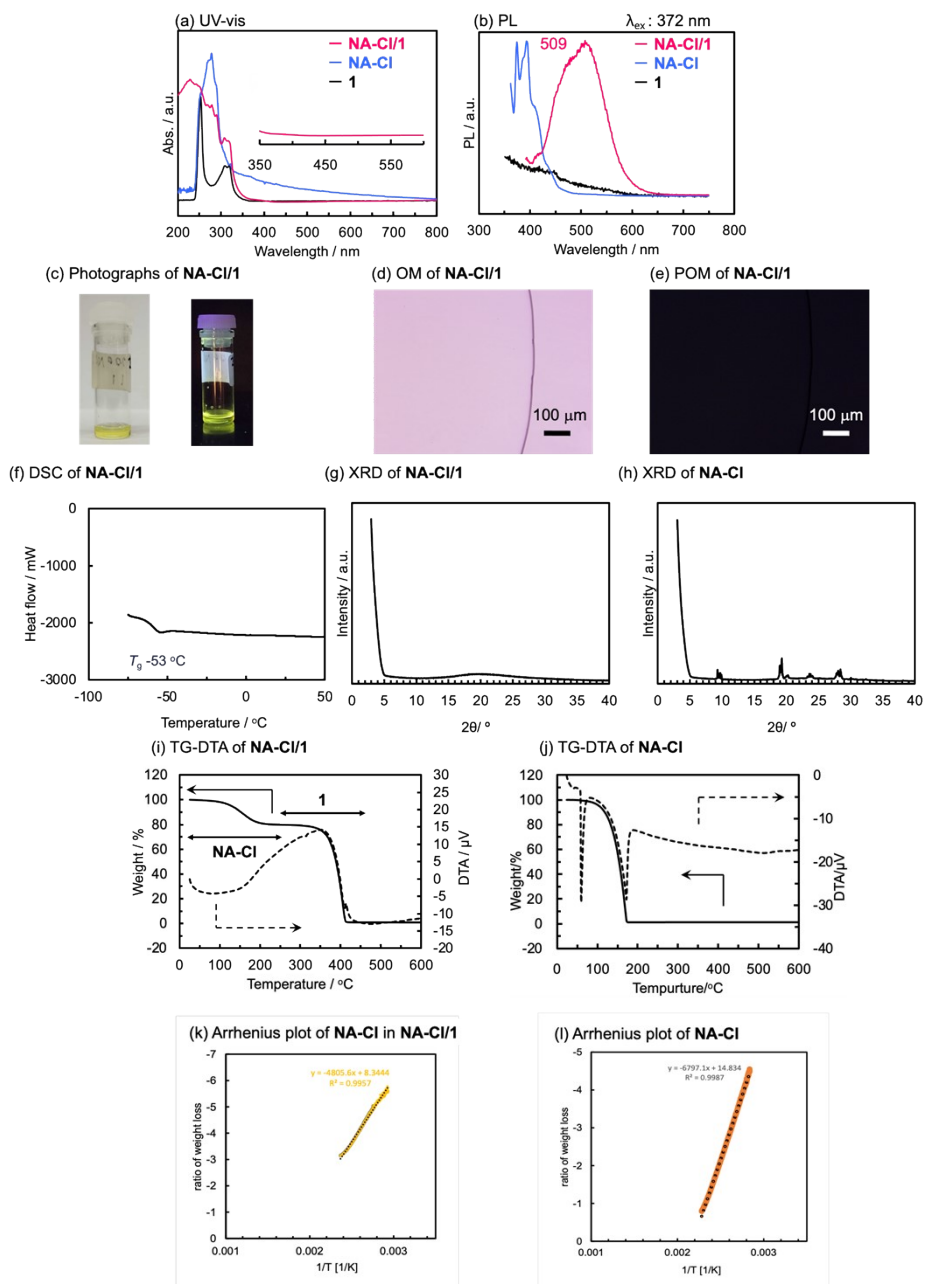

**Figure S3-5.** (a) UV-vis absorption and (b) PL spectra of NA-Cl/1, NA-Cl, and 1. (c) Photographs of NA-Cl/1 under room light (left) and black light (right) at r.t. (d and e) OM and POM observations of NA-Cl at r.t. (f) DSC traces of NA-Cl/1 on 2nd heating at a scanning velocity of 10  $^{\circ}\text{C}/\text{min}$ . (g and h) XRD patterns of NA-Cl/1 and NA-Cl at r.t. (i and j) TG-DTA traces of NA-Cl and NA-Cl/1 under  $\text{N}_2$  atmosphere. (k and l) Temperature dependences for weight loss due to vaporization process of NA-Cl ( $\ln W$  vs  $T^{-1}$ ) at 10 K/min heating rate under  $\text{N}_2$  atmosphere. These plots correspond to the range of weight loss of NA-Cl. The values shown in the figure indicate activation energies of each condition.

### S3-6. NA-COCH<sub>3</sub>

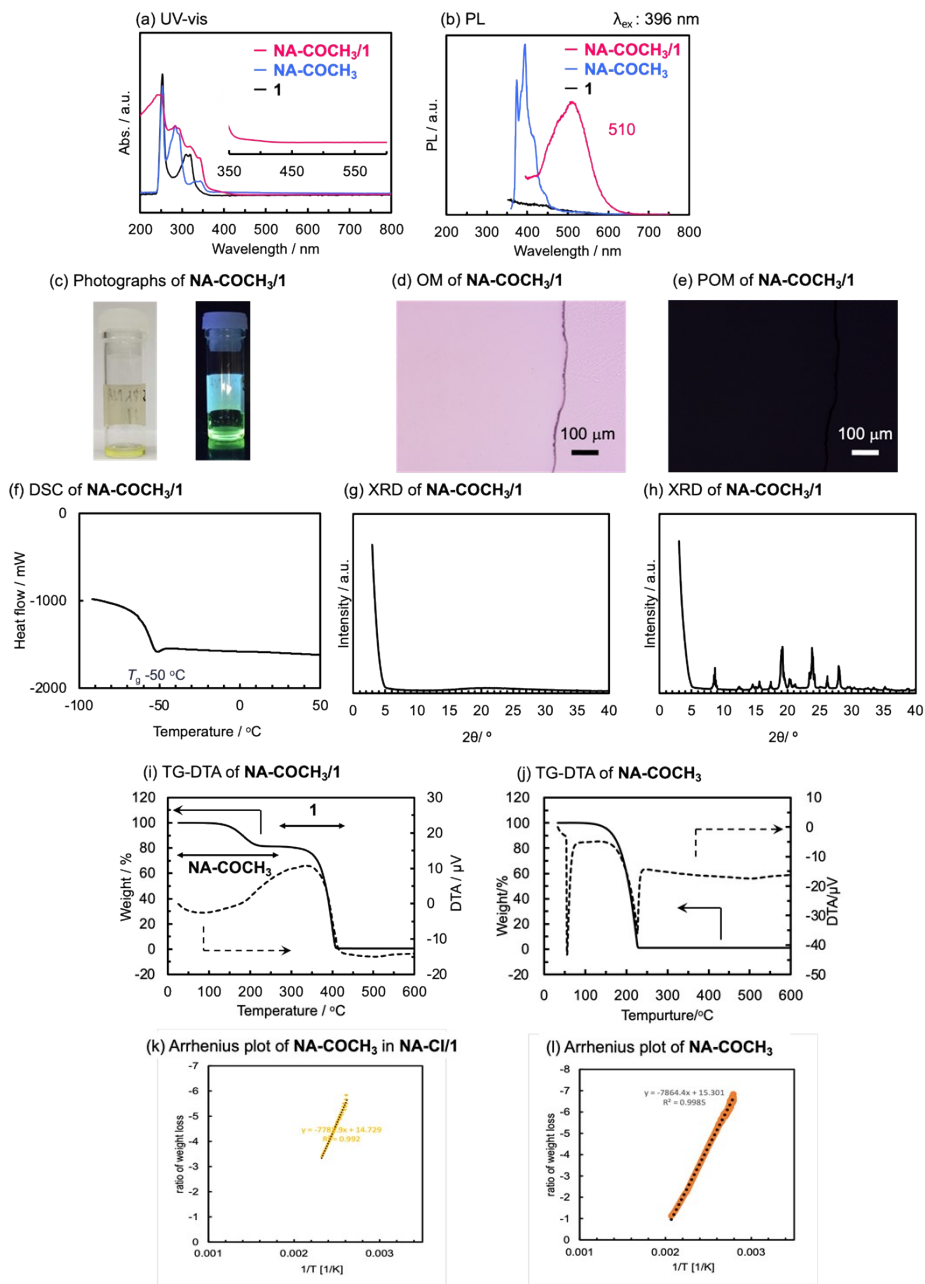

**Figure S3-6.** (a) UV-vis absorption and (b) PL spectra of NA-COCH<sub>3</sub>/1, NA-COCH<sub>3</sub>, and 1. (c) Photographs of NA-COCH<sub>3</sub>/1 under room light (left) and black light (right) at r.t. (d and e) OM and POM observations of NA-COCH<sub>3</sub> at r.t. (f) DSC traces of NA-COCH<sub>3</sub>/1 on 2nd heating at a scanning velocity of 10 °C/min. (g and h) XRD patterns of NA-COCH<sub>3</sub>/1 and NA-COCH<sub>3</sub> at r.t. (i and j) TG-DTA traces of NA-COCH<sub>3</sub> and NA-COCH<sub>3</sub>/1 under N<sub>2</sub> atmosphere. (k and l) Temperature dependences for weight loss due to vaporization process of NA-COCH<sub>3</sub> (lnW vs T<sup>-1</sup>) at 10 K/min heating rate under N<sub>2</sub> atmosphere. These plots correspond to the range of weight loss of NA-COCH<sub>3</sub>. The values shown in the figure indicate activation energies of each condition.

### S3-7. $\text{NA-COOCH}_3$

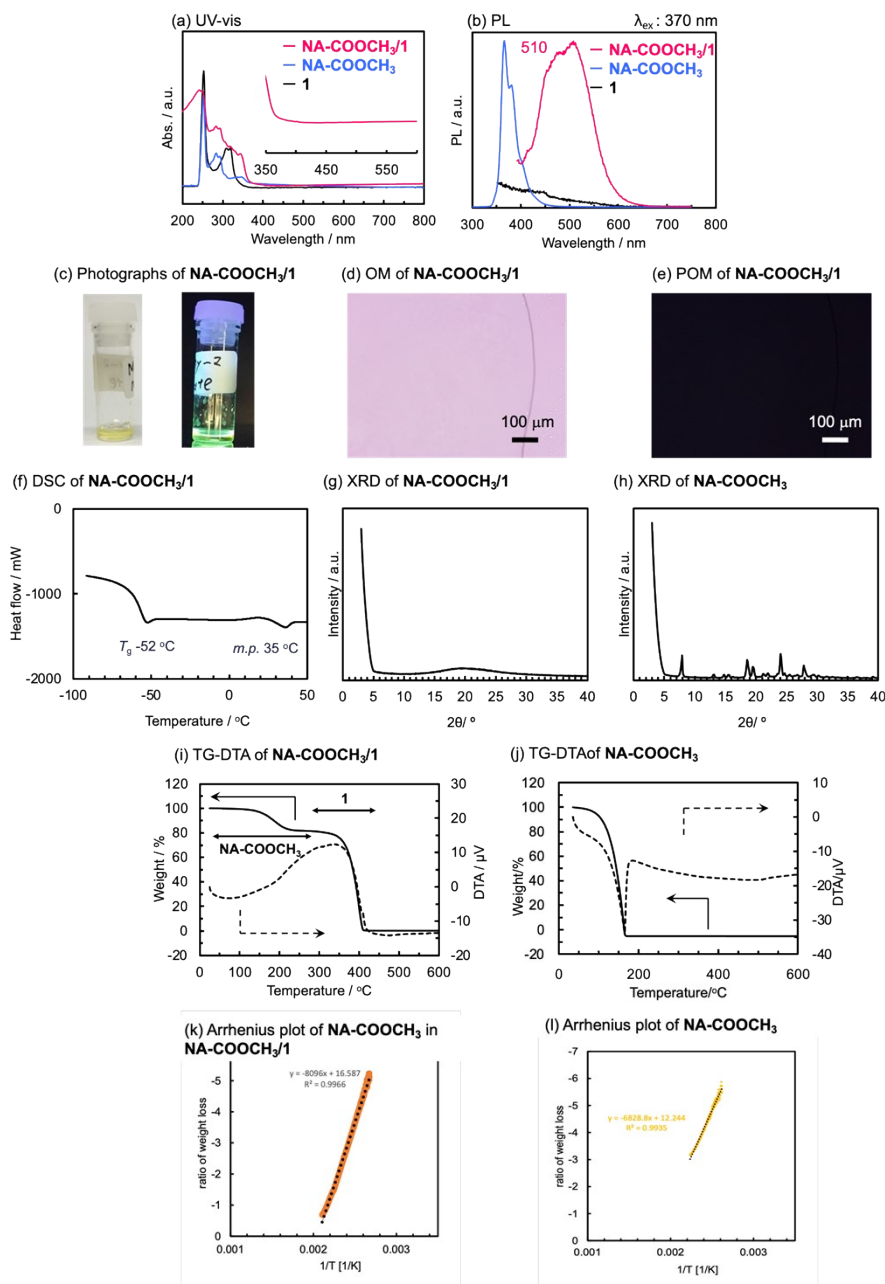

**Figure S3-7.** (a) UV-vis absorption and (b) PL spectra of  $\text{NA-COOCH}_3/1$ ,  $\text{NA-COOCH}_3$ , and **1**. (c) Photographs of  $\text{NA-COOCH}_3/1$  under room light (left) and black light (right) at r.t. (d and e) OM and POM observations of  $\text{NA-COOCH}_3$  at r.t. (f) DSC traces of  $\text{NA-COOCH}_3/1$  on 2nd heating at a scanning velocity of 10 °C/min. (g and h) XRD patterns of  $\text{NA-COOCH}_3/1$  and  $\text{NA-COOCH}_3$  at r.t. (i and j) TG-DTA traces of  $\text{NA-COOCH}_3$  and  $\text{NA-COOCH}_3/1$  under  $\text{N}_2$  atmosphere. (k and l) Temperature dependences for weight loss due to vaporization process of  $\text{NA-COOCH}_3$  ( $\ln W$  vs  $T^{-1}$ ) at 10 K/min heating rate under  $\text{N}_2$  atmosphere. These plots correspond to the range of weight loss of  $\text{NA-COOCH}_3$ . The values shown in the figure indicate activation energies of each condition.

### S3-8. NA-COH

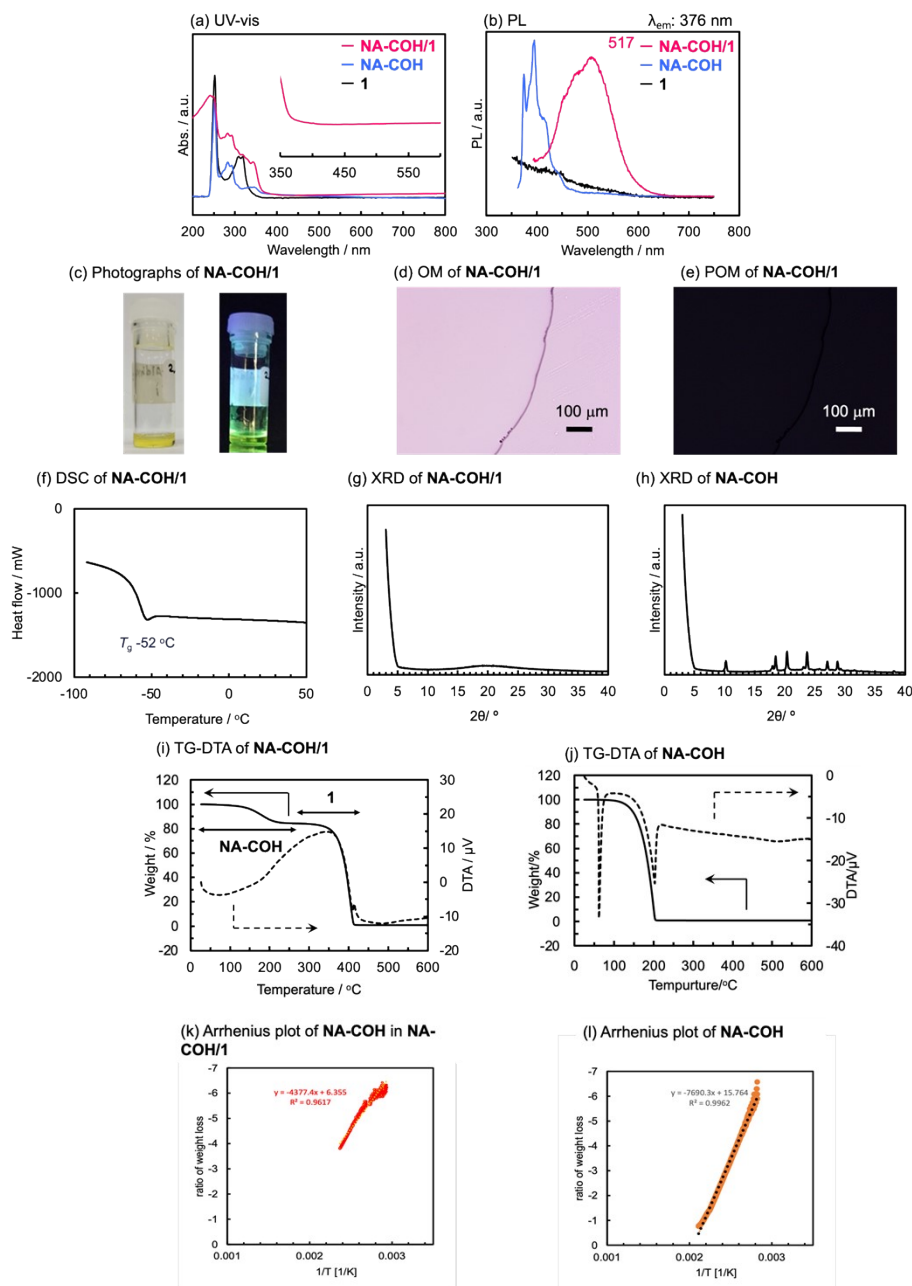

**Figure S3-8.** (a) UV-vis absorption and (b) PL spectra of NA-COH/1, NA-COH, and 1. (c) Photographs of NA-COH/1 under room light (left) and black light (right) at r.t. (d and e) OM and POM observations of NA-COH at r.t. (f) DSC traces of NA-COH/1 on 2nd heating at a scanning velocity of 10  $^{\circ}\text{C}/\text{min}$ . (g and h) XRD patterns of NA-COH/1 and NA-COH at r.t. (i and j) TG-DTA traces of NA-COH and NA-COH/1 under  $\text{N}_2$  atmosphere. (k and l) Temperature dependences for weight loss due to vaporization process of NA-COH ( $\ln W$  vs  $T^{-1}$ ) at 10 K/min heating rate under  $\text{N}_2$  atmosphere. These plots correspond to the range of weight loss of NA-COH. The values shown in the figure indicate activation energies of each condition.

### S3-9. NA-CN

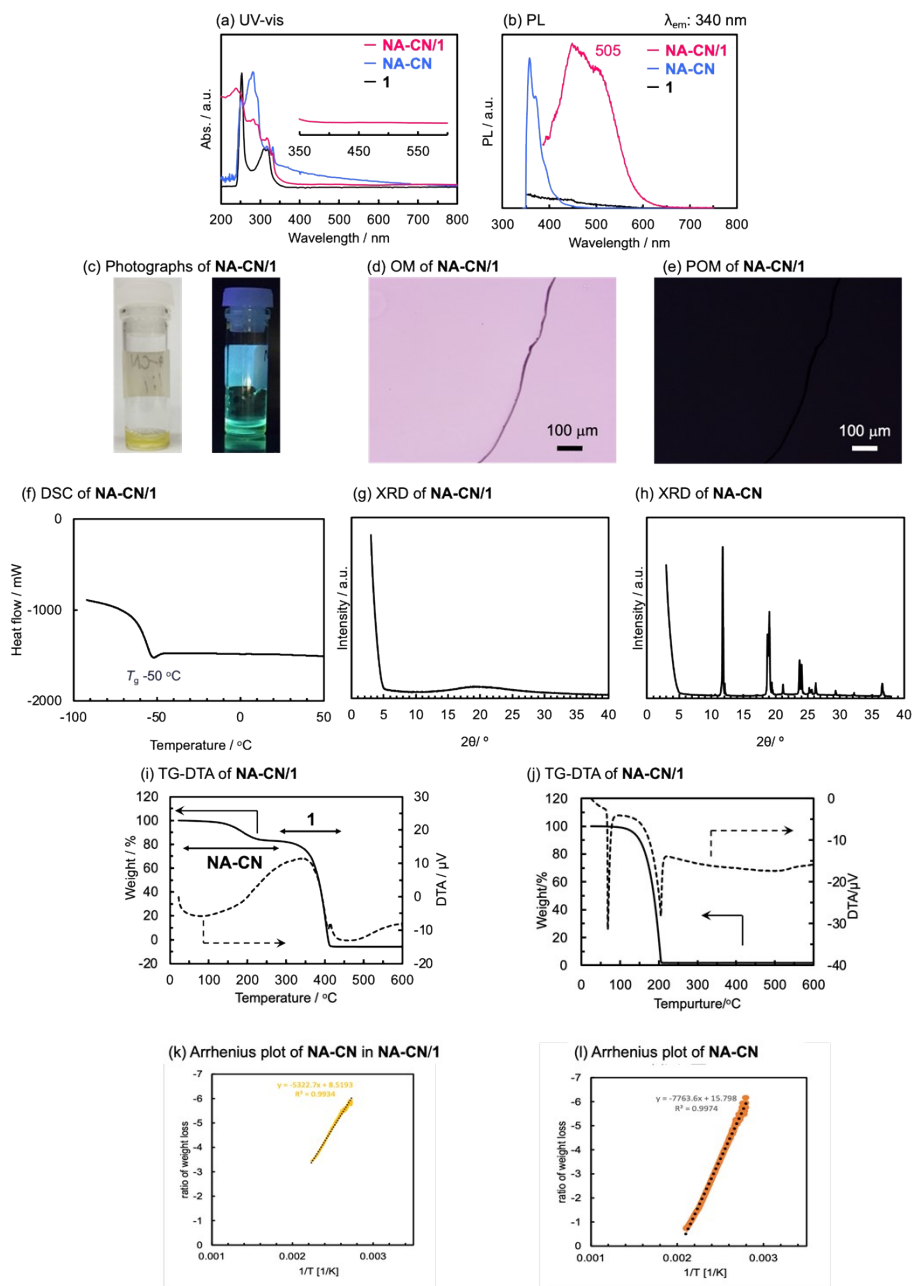

**Figure S3-9.** (a) UV-vis absorption and (b) PL spectra of NA-CN/1, NA-CN, and 1. (c) Photographs of NA-CN/1 under room light (left) and black light (right) at r.t. (d and e) OM and POM observations of NA-CN at r.t. (f) DSC traces of NA-CN/1 on 2nd heating at a scanning velocity of 10 °C/min. (g and h) XRD patterns of NA-CN/1 and NA-CN at r.t. (i and j) TG-DTA traces of NA-CN and NA-CN/1 under  $N_2$  atmosphere. (k and l) Temperature dependences for weight loss due to vaporization process of NA-CN ( $\ln W$  vs  $T^{-1}$ ) at 10 K/min heating rate under  $N_2$  atmosphere. These plots correspond to the range of weight loss of NA-CN. The values shown in the figure indicate activation energies of each condition.

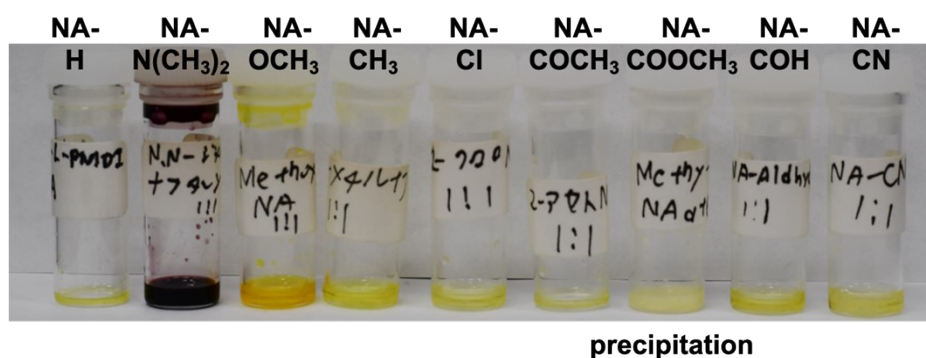

**Figure S3-10.** Photographs of **NA-#/1** cooled after 2h. All **NA-#/1** adapt solution states cooled after 2h except with **NA-COOCH<sub>3</sub>/1** in this experimental conditions. For **NA-COOCH<sub>3</sub>/1**, the precipitation was observed, however, heating process can recover into solution state, immediately.

### S3-11. BR-L-Val-PMDI (1)

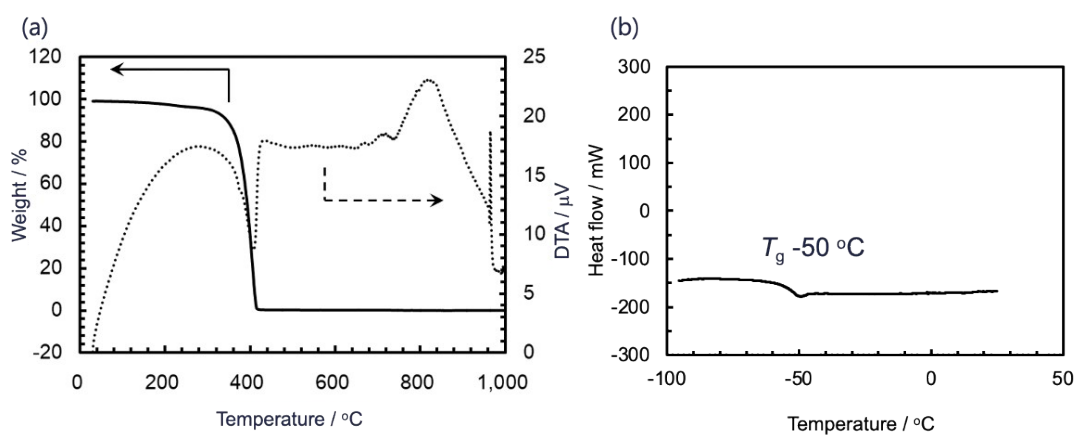

**Figure S3-11.** (a) TG-DTA trace of **1** under  $N_2$  atmosphere. (b) DSC traces of **1** on 2nd heating at a scanning velocity of  $1\text{ }^{\circ}\text{C}/\text{min}$ .

### S3-12. Summary

**Table S3-1.** Summary of photophysical and electronic properties and  $\Delta E$  of **NA-#s** and **NA-#/1**.

| NA-#s                               | UV-vis / nm | PL / nm | CT / nm | Ex. / nm | HOMO / eV <sup>a</sup> | LUMO / eV <sup>a</sup> | $\Delta E_{\text{NA-#s}} / \text{kJ/mol}^b$ | $\Delta E_{\text{NA-#s/1}} / \text{kJ/mol}^c$ | PLQY / % |
|-------------------------------------|-------------|---------|---------|----------|------------------------|------------------------|---------------------------------------------|-----------------------------------------------|----------|
| NA-N(CH <sub>3</sub> ) <sub>2</sub> | 300,530     | 390     | 532     | 340      | -4.91                  | -0.65                  | 68.9                                        | 51.2                                          | 0.4      |
| NA-CH <sub>3</sub>                  | 320         | 523     | 403     | 279,376  | -5.70                  | -0.86                  | 49.7                                        | 44.3                                          | 0.9      |
| NA-OCH <sub>3</sub>                 | 320,420     | 540     | 400     | 370      | -5.42                  | -0.90                  | 62.3                                        | 41                                            | 2.8      |
| NA-H                                | 320         | 520     | 392     | 279      | -5.79                  | -0.96                  | 46.6                                        | 36.8                                          | 7.5      |
| NA-Cl                               | 278         | 509     | -       | 372      | -6.04                  | -1.27                  | 56.5                                        | 40                                            | 1.8      |
| NA-COCH <sub>3</sub>                | 300         | 510     | -       | 372      | -6.12                  | -1.72                  | 64.5                                        | 64.7                                          | 1.7      |
| NA-CO <sub>2</sub> CH <sub>3</sub>  | 336         | 510     | -       | 370      | -6.72                  | -1.72                  | 67.3                                        | 56.8                                          | 2.3      |
| NA-COH                              | 340         | 517     | -       | 376      | -6.25                  | -1.88                  | 63.9                                        | 48                                            | 1.8      |
| NA-CN                               | 330         | 505     | -       | 280,370  | -6.39                  | -1.81                  | 64.5                                        | 44.3                                          | 2.4      |
| Me-L-Val-PMDI                       |             |         |         |          | -7.39                  | -3.01                  |                                             |                                               |          |

<sup>a</sup> calculated with a B3LYP-D3(BJ) functional using 6-31G(d,p) basis sets.

<sup>b</sup> calculated activation energy of NA-#s according to S5.

<sup>c</sup> calculated activation energy of NA-#s in NA-#s/1 according to S5.

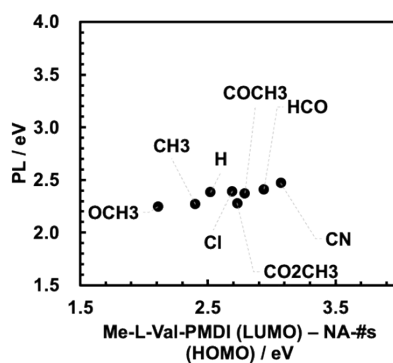

**Figure S3-12.** The relationship between peaks in PL spectra and HOMO-LUMO gap estimated by DFT calculations.

#### S4. Computational Details

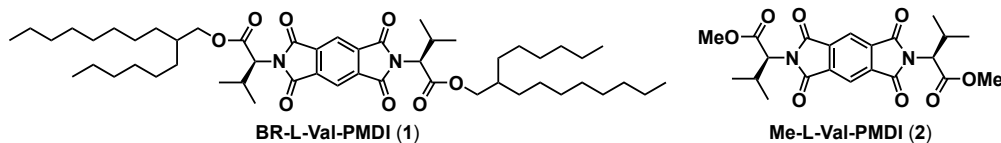

To obtain details of the electronic structure of **1·NA-H** complex, computational studies were carried out by using the model compound **Me-L-Val-PMDI (2)**. The molecular structure of **L-Val-PMDI·NA-H** complex obtained from a single-crystal X-ray diffraction analysis was used as an initial structure of the model compound **2·NA-H** complex in which CO<sub>2</sub>H groups were replaced by CO<sub>2</sub>Me. All calculations were performed in the gas phase using the *Gaussian 16* program package (Rev. C.01).<sup>4</sup> The ground-state geometry optimization of **2·NA-H** was carried out with a B3LYP-D3(BJ) functional<sup>5</sup> using 6-31G(d,p) basis sets. After each geometry optimization, a frequency calculation at the same level was performed to verify that all the stationary points had no imaginary frequency. Interaction energy in **2·NA-H** complex summarized in Table S4-1 was evaluated through single point calculation with counterpoise correction at the B3LYP-D3(BJ)/6-311+G(d,p) level of theory.<sup>6</sup> The time-dependent density functional theory (TD-DFT)<sup>7</sup> calculation was performed with a CAM-B3LYP-D3(BJ) functional<sup>8</sup> using 6-31+G(d,p) basis sets. The result for TD-DFT calculation is summarized in Table S4-2 and Figure S4-1.

**Table S4-1.** Interaction energy in **2·NA-H** (kcal/mol).

|               | raw    | corrected | BSSE |
|---------------|--------|-----------|------|
| <b>2·NA-H</b> | -17.55 | -15.20    | 2.35 |

**Table S4-2.** Calculated wavelengths for the absorption spectrum of **2·NA-H** complex, its oscillator strengths, and the associated transitions with |CI coefficient| > 0.2.

| Wavelength (nm) | Oscillator strength | MO contribution | CI coefficient |
|-----------------|---------------------|-----------------|----------------|
| 376             | 0.0263              | HOMO → LUMO     | 0.7046         |
|                 |                     | HOMO-5 → LUMO   | 0.31684        |
|                 |                     | HOMO-4 → LUMO   | 0.46265        |
|                 |                     | HOMO-3 → LUMO   | -0.21898       |
|                 |                     | HOMO-2 → LUMO+1 | 0.22735        |
| 278             | 0.0289              | HOMO → LUMO+1   | 0.68086        |
| 271             | 0.025               | HOMO-1 → LUMO+2 | 0.23191        |
|                 |                     | HOMO-1 → LUMO+3 | 0.25429        |
|                 |                     | HOMO → LUMO+2   | 0.41143        |
|                 |                     | HOMO → LUMO+4   | -0.33204       |

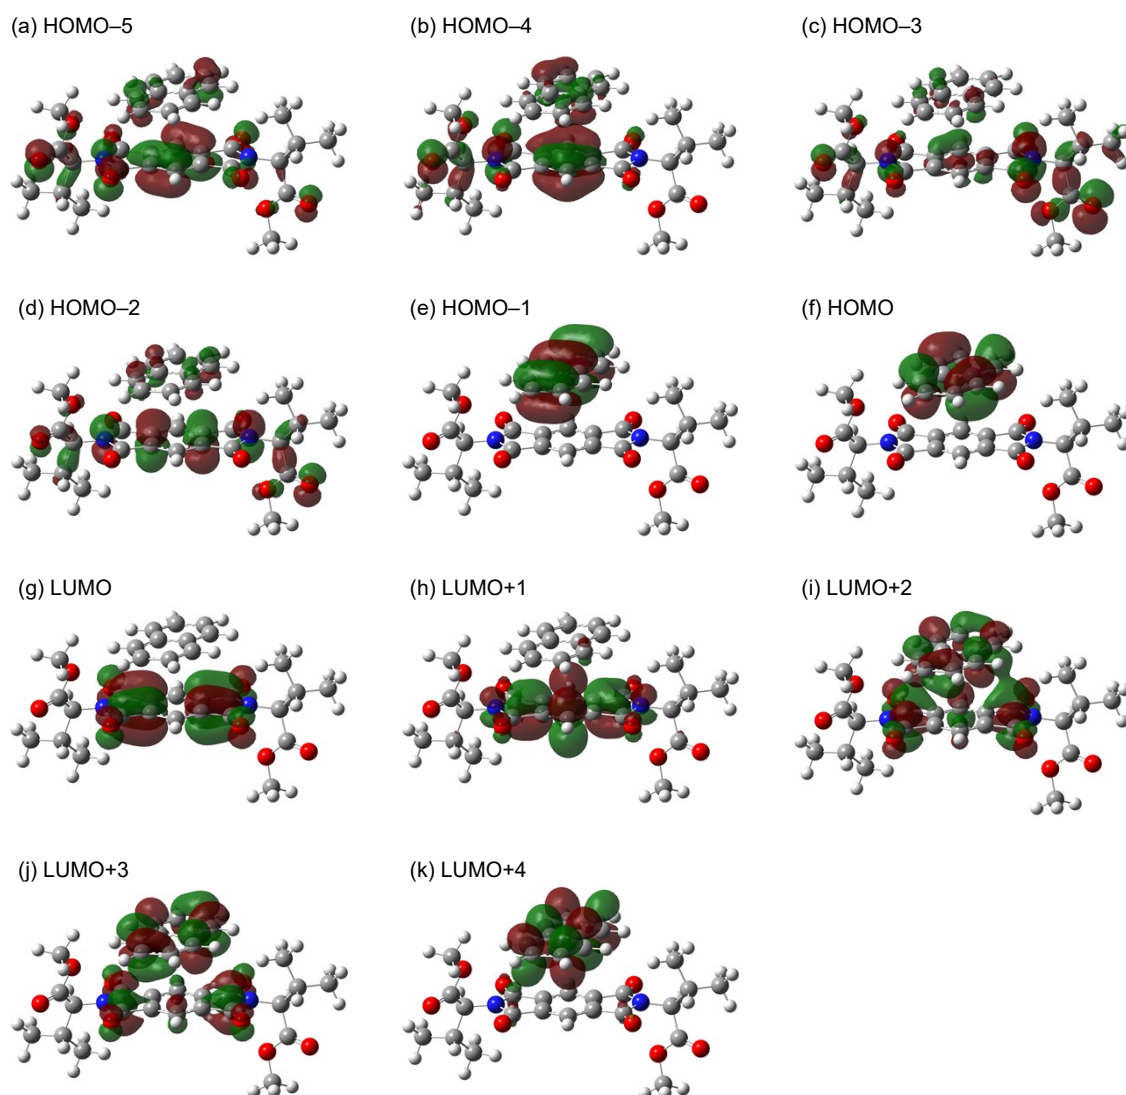

**Figure S4-1.** Selected molecular orbitals of **2·NA-H** complex at the CAM-B3LYP-D3(BJ)/6-31+G(d,p) level of theory. The molecular orbitals are drawn with a contour value of 0.03 atomic unit.

### S5. Arrhenius plot

TG diagrams obtained using the heating method can be analyzed by reaction kinetics theory.<sup>9</sup> The sublimation rate  $v$  follows an Arrhenius trend as

$$\frac{dm}{dt} = v = A \exp\left(-\frac{\Delta E}{RT}\right) f(m) \quad (1)$$

where  $m$ ,  $A$ ,  $\Delta E$ ,  $R$ , and  $T$  are mass loss rate, a pre-exponential factor, the activation energy, the universal real gas constant, and absolute temperature, respectively.  $f(m)$  denotes  $(1-m)^n$ , and the parameter  $n$  is 1.0 when the sample is powder solids. Eq.(1) can be rewritten as

$$\ln v - n \ln(1-m) = -\left(\frac{\Delta E}{R}\right) \frac{1}{T} + \ln A \quad (2)$$

The  $\Delta E$  can be calculated from the slope of plots of  $\ln v - n \ln(1-m)$  and  $1/T$ . Arrhenius plots of TG diagrams in Figure S3-1(g) to 9(g) were illustrated in Figure S3-1(h and i) to 9(h and i) by using the temperature range of vaporization for NA-#s, where the values of  $\Delta E$  were determined in Table , respectively.

## S6. Thermal-responsive behavior

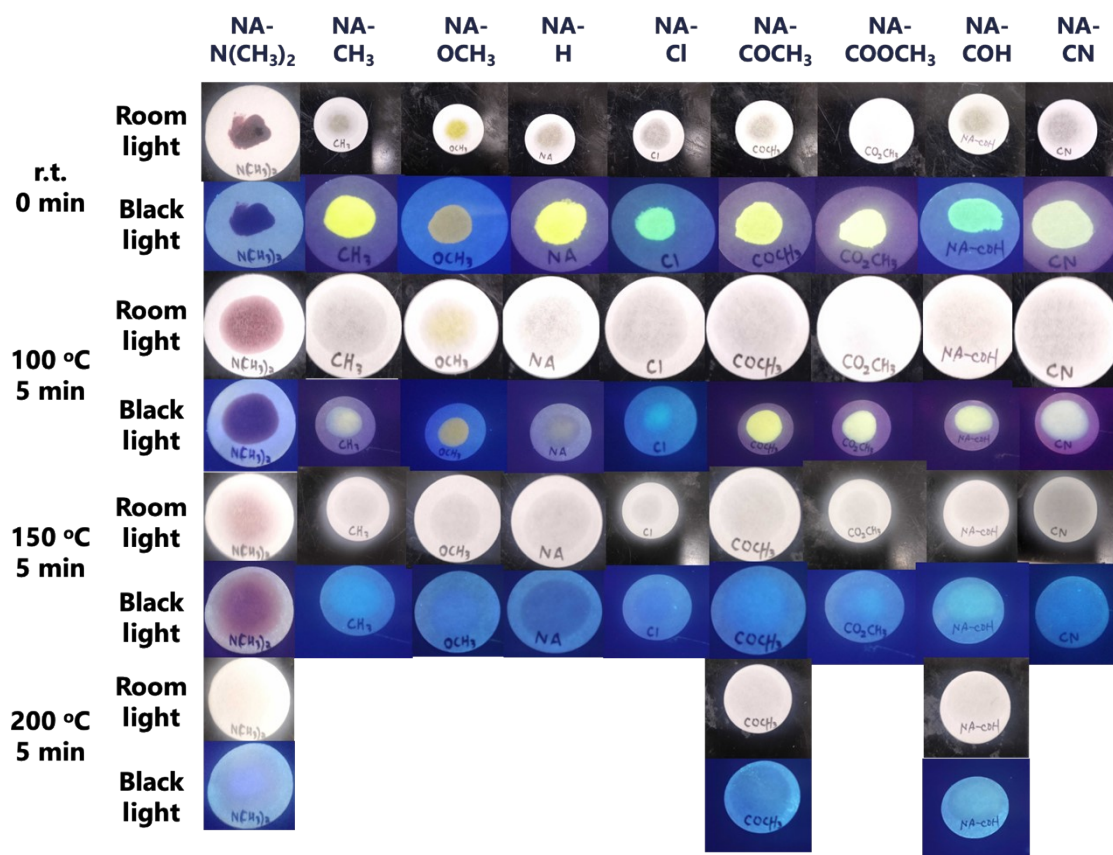

Figure S6-1. Thermal-responsive behaviors of NA-#s/1 in response to heating at 100, 150, and 200 °C.

NA-#s/1 printed onto filter papers were heated on the hot plate at 100, 150, and 200 °C for 5 min.

For NA-N(CH<sub>3</sub>)<sub>2</sub>/1, N(CH<sub>3</sub>)<sub>2</sub> retained on the filter paper upon heating at 100 and 150 °C for 5 min, whereas

N(CH<sub>3</sub>)<sub>2</sub> was vaporized at 200 °C for 5 min. Another NA-#s/1 were similar behavior to NA-N(CH<sub>3</sub>)<sub>2</sub>/1.

## References

1. K. Faghghi, M. Hajibeygi, M. Shabani, *J. Macromol. Sci. Part A* **2010**, *47*, 144–153.
2. G. M. Sheldrick, *Acta Cryst.* **2015**, *A71*, 3–8.
3. G. M. Sheldrick, *Acta Cryst.* **2015**, *C71*, 3–8.
4. *Gaussian 16, Revision C.01*, M. J. Frisch, G. W. Trucks, H. B. Schlegel, G. E. Scuseria, M. A. Robb, J. R. Cheeseman, G. Scalmani, V. Barone, G. A. Petersson, H. Nakatsuji, X. Li, M. Caricato, A. V. Marenich, J. Bloino, B. G. Janesko, R. Gomperts, B. Mennucci, H. P. Hratchian, J. V. Ortiz, A. F. Izmaylov, J. L. Sonnenberg, D. Williams-Young, F. Ding, F. Lipparini, F. Egidi, J. Goings, B. Peng, A. Petrone, T. Henderson, D. Ranasinghe, V. G. Zakrzewski, J. Gao, N. Rega, G. Zheng, W. Liang, M. Hada, M. Ehara, K. Toyota, R. Fukuda, J. Hasegawa, M. Ishida, T. Nakajima, Y. Honda, O. Kitao, H. Nakai, T. Vreven, K. Throssell, J. A. Montgomery, Jr., J. E. Peralta, F. Ogliaro, M. J. Bearpark, J. J. Heyd, E. N. Brothers, K. N. Kudin, V. N. Staroverov, T. A. Keith, R. Kobayashi, J. Normand, K. Raghavachari, A. P. Rendell, J. C. Burant, S. S. Iyengar, J. Tomasi, M. Cossi, J. M. Millam, M. Klene, C. Adamo, R. Cammi, J. W. Ochterski, R. L. Martin, K. Morokuma, O. Farkas, J. B. Foresman, and D. J. Fox, Gaussian, Inc., Wallingford CT, 2019.
5. (a) A. D. Becke, *Phys. Rev. A: Gen. Phys.* **1988**, *38*, 3098–3100.  
(b) C. Lee, W. Yang, R. G. Parr, *Phys. Rev. B: Condens. Matter* **1988**, *37*, 785–789.  
(c) A. D. Becke, *J. Chem. Phys.* **1993**, *98*, 1372–1377.  
(d) A. D. Becke, *J. Chem. Phys.* **1993**, *98*, 5648–5652.
6. S. Grimme, S. Ehrlich, L. Goerigk, *J. Comp. Chem.* **2011**, *32*, 1456–1465.
7. (a) R. Bauernschmitt, R. Ahlrichs, *Chem. Phys. Lett.* **1996**, *256*, 454–464.  
(b) M. E. Casida, C. Jamorski, K. C. Casida, D. R. Salahub, *J. Chem. Phys.* **1998**, *108*, 4439–4449.
8. T. Yanai, D. Tew, N. Handy, *Chem. Phys. Lett.* **2004**, *393*, 51–57.
9. R. D. Chirico, S. E. Knipmeyer, A. Nguyen and W. V. Steele, *J. Chem. Thermodyn.* **1993**, *25*, 1461–1494.
